# Supplementary material
Source: PubMed Central journal article supplement (PMC7073922)
Supplement: djz137_supplementary_data.pdf [file djz137_supplementary_data.pdf]

## SUPPLEMENTARY MATERIALS

### Supplementary Tables

**Supplementary Table 1. Breast, cervical, and colorectal cancer screening process metrics by PROSPR research site\***

| PROSPR site                             | Breast<br>Age 40-74 |      |      |      | Cervical<br>Age 21-64 |      |      |      |      | Colorectal<br>Age 50-75 |      |      |      |
|-----------------------------------------|---------------------|------|------|------|-----------------------|------|------|------|------|-------------------------|------|------|------|
|                                         | A                   | B    | C    | D    | I                     | J    | K    | L    | M    | E                       | F    | G    | H    |
| Percent tested                          | 52.7                | 39.4 | 46.6 | 42.4 | 23.6                  | 30.7 | 21.8 | 26.0 | 20.5 | 31.4                    | 45.5 | 37.5 | 22.2 |
| Percent screened                        | 46.2                | 36.9 | 44.9 | 40.1 | 23.0                  | 30.3 | 21.2 | 24.7 | 19.7 | 27.2                    | 43.3 | 34.6 | 20.6 |
| Percent testing up-to-date              | 74.1                | 56.2 | 65.9 | 61.3 | 80.2                  | 86.7 | 83.9 | 87.0 | 66.2 | 69.1                    | 78.5 | 79.3 | 44.4 |
| Percent screening abnormal              | 9.1                 | 8.6  | 10.8 | 11.7 | 3.0                   | 4.8  | 3.7  | 4.7  | 5.3  | 5.7                     | 4.0  | 4.8  | 6.9  |
| Percent with diagnostic evaluation      | 93.8                | 97.5 | 97.2 | 97.3 | 88.0                  | 82.9 | 86.5 | 58.9 | 70.9 | 63.9                    | 81.4 | 73.3 | 45.6 |
| Cancer / 1,000 screens                  | 4.97                | 5.96 | 6.04 | 5.68 | 0.23                  | 0.13 | 0.16 | 0.22 | 0.31 | 1.95                    | 1.15 | 1.79 | 1.48 |
| Cancers / 1,000 women in the population | 3.99                | 3.02 | 3.78 | 2.65 | 0.07                  | 0.06 | 0.06 | 0.10 | 0.23 | 0.70                    | 0.82 | 0.83 | 0.63 |

\*Each letter, A to M, represents an individual PROSPR research site.

**Supplementary Table 2. Breast cancer screening process metrics by age group and PROSPR research site\***

| PROSPR site                             | Age 40-49 y |      |      |      | Age 50-64 y |      |      |      | Age 65-74 y |      |      |      |
|-----------------------------------------|-------------|------|------|------|-------------|------|------|------|-------------|------|------|------|
|                                         | A           | B    | C    | D    | A           | B    | C    | D    | A           | B    | C    | D    |
| Percent tested                          | 47.4        | 33.2 | 41.1 | 34.4 | 54.6        | 40.6 | 47.9 | 44.0 | 56.3        | 46.4 | 52.3 | 49.4 |
| Percent screened                        | 41.4        | 30.6 | 39.3 | 31.9 | 48.4        | 38.3 | 46.2 | 42.0 | 48.4        | 43.9 | 50.6 | 46.9 |
| Percent testing up-to-date              | 70.6        | 49.2 | 60.5 | 46.5 | 75.5        | 58.0 | 66.9 | 65.1 | 75.4        | 62.0 | 70.6 | 72.4 |
| Percent screening abnormal              | 13.1        | 11.3 | 14.3 | 16.2 | 8.0         | 8.2  | 9.7  | 10.9 | 6.6         | 6.2  | 8.9  | 8.8  |
| Percent with diagnostic evaluation      | 95.4        | 97.5 | 97.4 | 97.2 | 92.6        | 97.5 | 97.1 | 97.4 | 93.2        | 97.8 | 97.1 | 97.4 |
| Cancer / 1,000 screens                  | 2.95        | 2.85 | 5.15 | 3.59 | 5.35        | 5.87 | 5.29 | 5.39 | 6.65        | 9.68 | 8.86 | 8.46 |
| Cancers / 1,000 women in the population | 2.64        | 1.57 | 2.62 | 1.69 | 4.04        | 3.28 | 3.70 | 2.52 | 5.90        | 4.78 | 5.82 | 4.27 |

\*Individual PROSPR breast cancer research sites are labeled A to D.

**Supplementary Table 3. Cervical cancer screening process metrics by age group and PROSPR research site\***

| PROSPR site                                    | Age 21-29 y |      |      |      |      | Age 30-49 y |      |      |      |      | Age 50-64 y |      |      |      |      |
|------------------------------------------------|-------------|------|------|------|------|-------------|------|------|------|------|-------------|------|------|------|------|
|                                                | I           | J    | K    | L    | M    | I           | J    | K    | L    | M    | I           | J    | K    | L    | M    |
| Percent tested                                 | 23.6        | 28.9 | 24.3 | 33.0 | 22.9 | 24.9        | 32.4 | 22.8 | 27.7 | 22.6 | 22.1        | 29.5 | 18.4 | 20.0 | 13.1 |
| Percent screened                               | 22.7        | 28.4 | 23.6 | 30.3 | 21.9 | 24.3        | 31.9 | 22.1 | 26.5 | 21.8 | 21.9        | 29.3 | 18.0 | 19.4 | 12.8 |
| Percent testing up-to-date                     | 63.9        | 70.2 | 65.7 | 85.3 | 68.4 | 86.9        | 92.4 | 89.9 | 87.5 | 73.7 | 79.1        | 86.4 | 84.7 | 87.7 | 47.9 |
| Percent screening abnormal                     | 5.41        | 6.4  | 5.3  | 7.3  | 7.3  | 3.0         | 5.3  | 3.9  | 4.8  | 4.9  | 1.5         | 2.9  | 1.9  | 2.2  | 3.3  |
| Percent with diagnostic evaluation             | 90.6        | 72.7 | 83.6 | 57.6 | 66.6 | 88.4        | 87.0 | 88.1 | 62.5 | 74.8 | 82.1        | 84.3 | 86.8 | 52.1 | 68.1 |
| Cancer / 1,000 screens (2012)                  | 0.00        | 0.06 | 0.01 | 0.11 | 0.00 | 0.20        | 0.20 | 0.20 | 0.17 | 0.18 | 0.42        | 0.07 | 0.18 | 0.40 | 1.53 |
| Cancers / 1,000 women in the population (2012) | 0.00        | 0.02 | 0.01 | 0.06 | 0.03 | 0.06        | 0.08 | 0.09 | 0.10 | 0.22 | 0.12        | 0.04 | 0.07 | 0.12 | 0.32 |

\* Individual PROSPR cervical cancer research sites are labeled I to M.

**Supplementary Table 4. Colorectal cancer screening process metrics by age group and PROSPR research center\***

| PROSPR site                                    | Age 50-64 y |       |      |      | Age 65-75 y |      |      |
|------------------------------------------------|-------------|-------|------|------|-------------|------|------|
|                                                | E           | F     | G    | H    | E           | F    | G    |
| Percent tested                                 | 29.1        | 44.6  | 37.3 | 22.2 | 36.5        | 47.7 | 37.8 |
| Percent screened                               | 25.6        | 42.8  | 34.9 | 20.6 | 30.9        | 44.6 | 34.0 |
| Percent testing up-to-date                     | 64.4        | 74.5  | 76.3 | 44.4 | 79.1        | 87.1 | 85.8 |
| Percent screening abnormal                     | 5.2         | 3.6   | 4.4  | 6.9  | 6.6         | 4.8  | 5.9  |
| Percent with diagnostic evaluation (2012)      | 63.5        | 83.0  | 75.0 | 45.6 | 64.4        | 78.9 | 70.4 |
| Cancer / 1,000 screens (2012)                  | 1.52        | 1.00  | 1.61 | 1.48 | 2.74        | 1.48 | 2.21 |
| Cancers / 1,000 women in the population (2012) | 0.48        | 0.058 | 0.63 | 0.63 | 1.22        | 1.18 | 1.20 |

\* Individual PROSPR colorectal cancer research sites are labeled E to H.
